# Supplementary material
Source: publisher figshare collection journal article supplement (https://acs.figshare.com/ndownloader/files/4618960)
Supplement: Supplementary file 1 [file 4618960]

## **Supporting information for:**

Comparative assessments of BTX natural attenuation by quantitative PCR of a catabolic gene, signature metabolites, and compound-specific isotope analysis

Harry R. Beller\*<sup>1</sup>, Staci R. Kane<sup>1</sup>, Tina C. Legler<sup>1</sup>, Jennifer R. McKelvie<sup>2</sup>, Barbara Sherwood Lollar<sup>2</sup>, Francesca Pearson<sup>1</sup>, Lianna Balser<sup>1</sup>, and Douglas M. Mackay<sup>3</sup>

<sup>1</sup>Lawrence Livermore National Laboratory, Livermore, CA

<sup>2</sup>Department of Geology, University of Toronto, Toronto, ON, Canada

<sup>3</sup>Department of Land, Air & Water Resources, University of California, Davis, CA

SI includes three figures

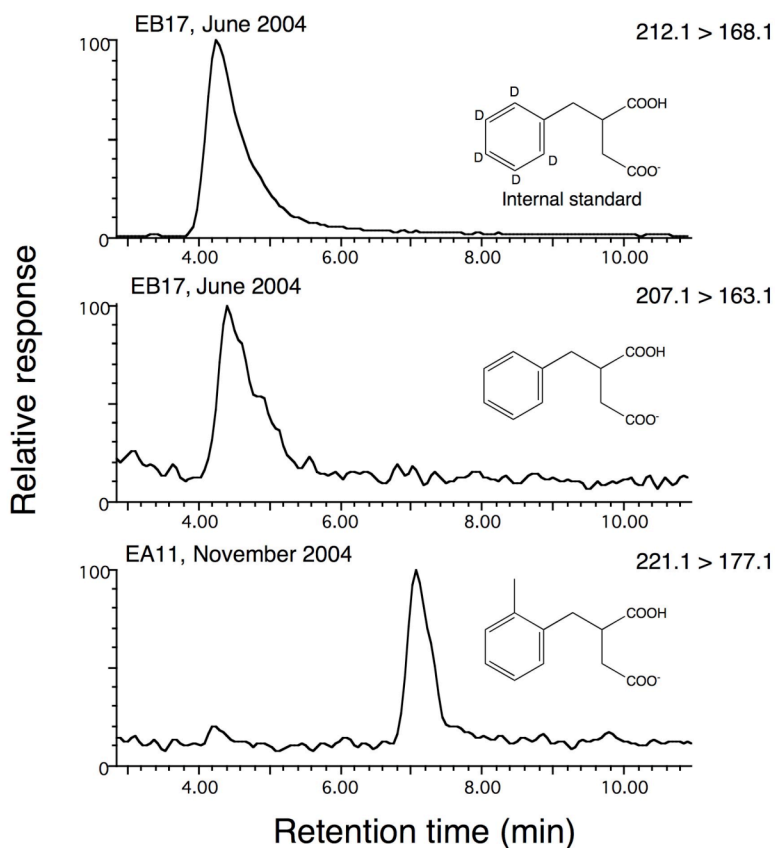

**Figure S1.** Mass chromatograms for LC/MS/MS (selected reaction monitoring) analysis of the internal standard BS-*d*<sub>5</sub> ( $m/z$  212  $\rightarrow$  168 transition) (top), BS ( $m/z$  207  $\rightarrow$  163 transition) (middle), and 2MeBS ( $m/z$  221  $\rightarrow$  177 transition) (bottom). As shown, BS and the deuterium-labeled internal standard have the same retention time.

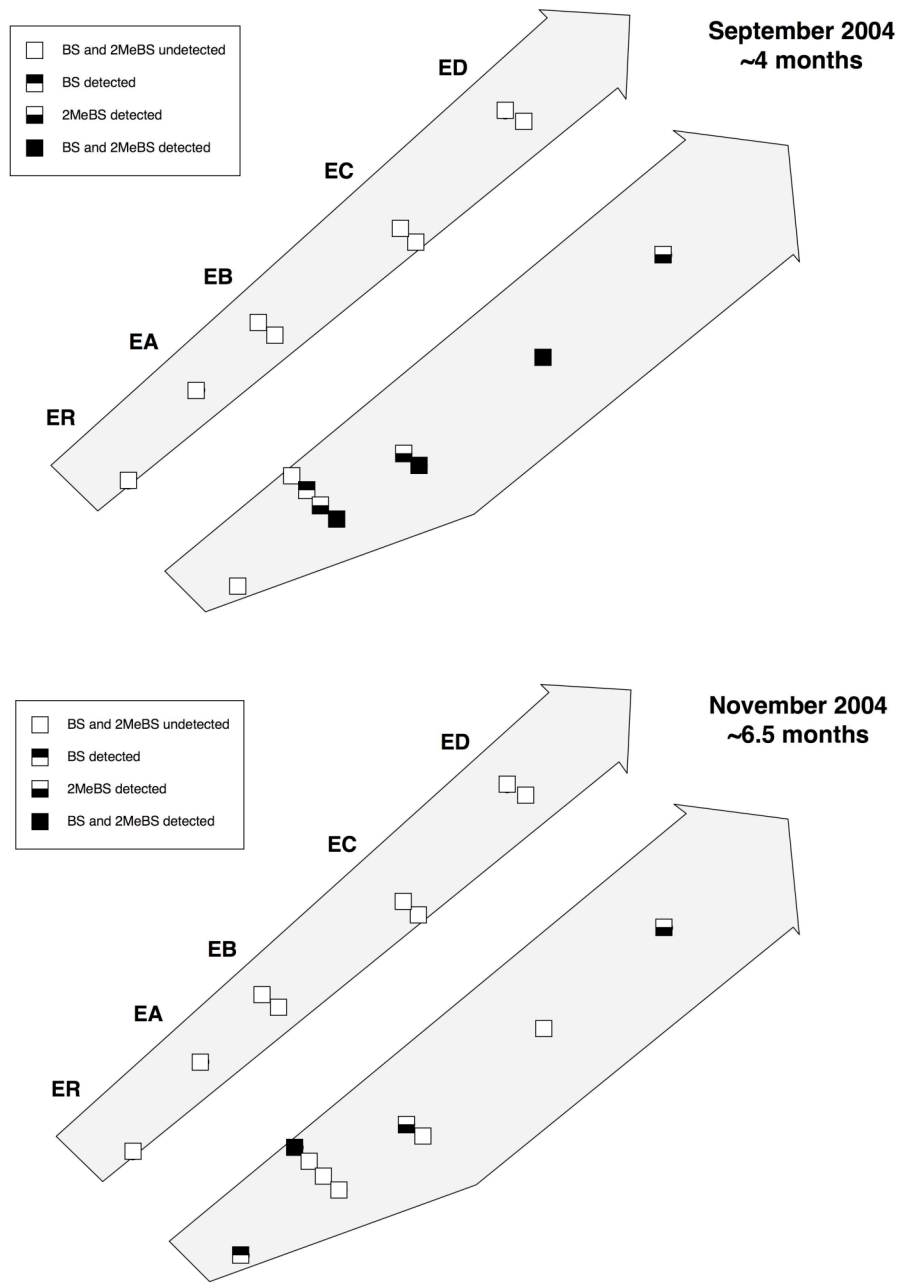

**Figure S2.** Signature metabolite [benzylsuccinate, or BS, and (2-methylbenzyl)succinate, or 2MeBS] detections at two sampling times: ~4 months after the controlled release began (upper), and ~6.5 months after the controlled release began (lower).

**A**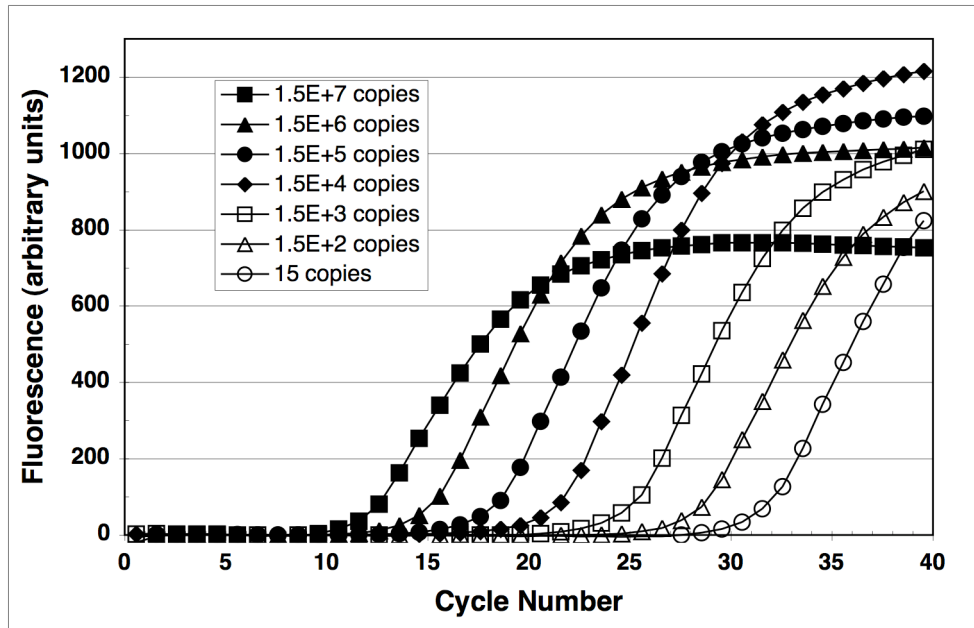**B**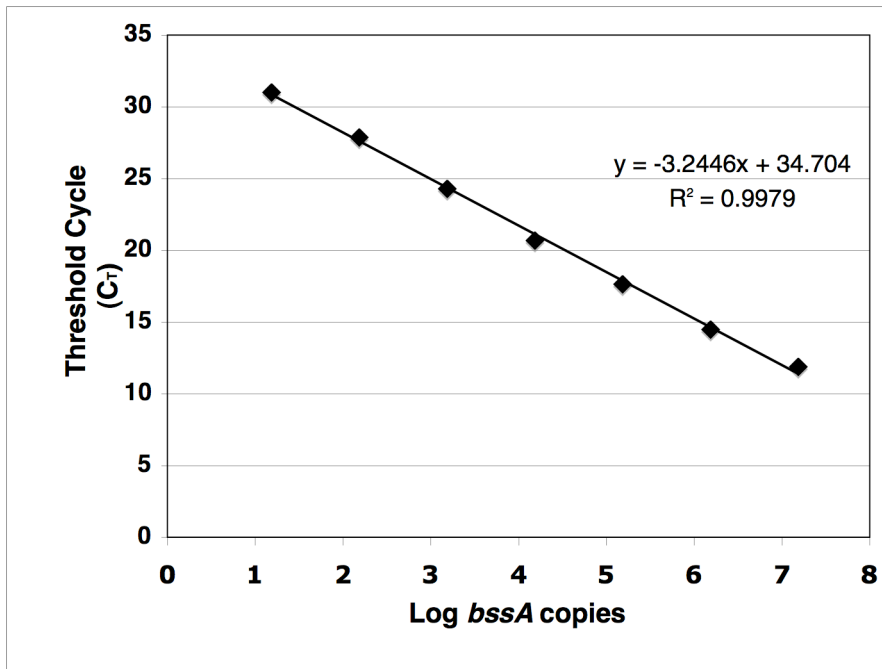

**Figure S3.** Example of a calibration curve for *bssA* (using genomic DNA from strain PRTOL1, a SRB). (A) Fluorescence vs. PCR cycle number for seven *bssA* standard concentrations. A line denotes the threshold level; the threshold cycle ( $C_T$ ) is defined as the PCR cycle at which fluorescence exceeds the threshold level. (B) Threshold cycle vs. log *bssA* copies for the data presented in panel A.
